# Supplementary material
Source: PubMed Central journal article supplement (PMC5108040)
Supplement: ml6b00062_si_002.pdf [file ml6b00062_si_002.pdf]

# Preparation of SG3249 antibody-drug conjugates

## Conjugate A: Herceptin-SG3249 (ConjA)

Antibody (15 mg, 100 nanomoles) was diluted into 13.5 mL of a reduction buffer containing 10 mM sodium borate pH 8.4, 2.5 mM EDTA and a final antibody concentration of 1.11 mg/mL. A 10 mM solution of TCEP was added (1.5 molar equivalent/antibody, 150 nanomoles, 15  $\mu$ L) and the reduction mixture was heated at +37 °C for 1.5 hours in an incubator. After cooling down to room temperature, SG3249 was added as a DMSO solution (5 molar equivalent/antibody, 500 nanomoles, in 1.5 mL DMSO). The solution was mixed for 1.25 hours at room temperature, then the conjugation was quenched by addition of *N*-acetyl cysteine (1 micromole, 100  $\mu$ L at 10 mM), and injected into an AKTA™ Pure FPLC using a GE Healthcare HiLoad™ 26/600 column packed with Superdex 200 PG, eluting with 2.6 mL/min of sterile-filtered phosphate-buffered saline (PBS). Fractions corresponding to **ConjA** monomer peak were pooled, concentrated using a 15mL Amicon Ultracell 50KDa MWCO spin filter, analysed and sterile-filtered.

UHPLC analysis on a Shimadzu Prominence system using a Phenomenex Aeris 3.6u XB-C18 150 x 2.1 mm column eluting with a gradient of water and acetonitrile on a reduced sample of **ConjA** at 280 nm and 330 nm (SG3249 specific) shows a mixture of light and heavy chains attached to several molecules of SG3249, consistent with a drug-per-antibody ratio (DAR) of 2.51 molecules of SG3249 per antibody.

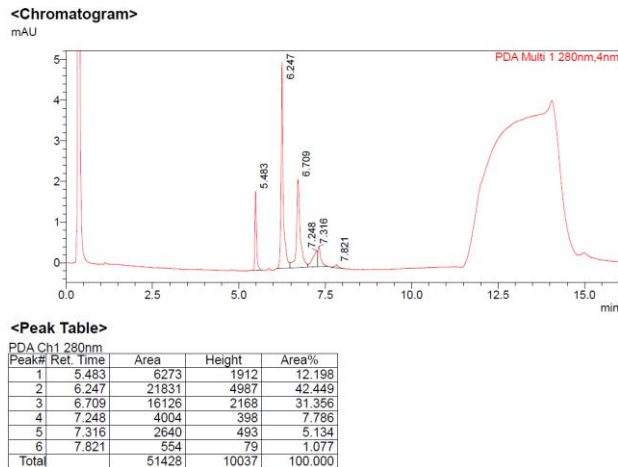

Fig A. UHPLC of reduced ConjA at 280 nm

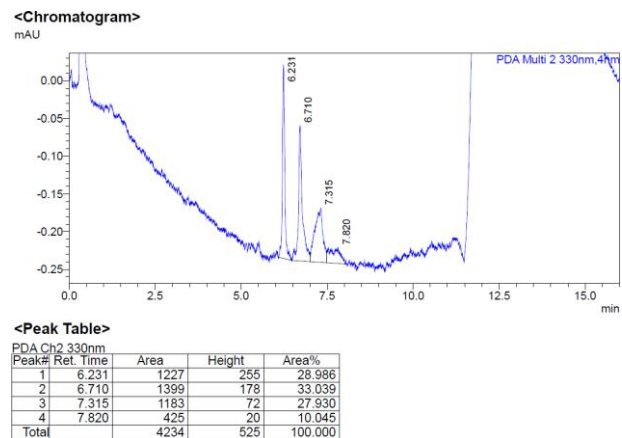

Fig B. UHPLC of reduced ConjA at 330 nm

UHPLC analysis on a Shimadzu Prominence system using a Phenomenex Yarra 3u SEC-3000 300 mm x 4.60 mm column eluting with sterile-filtered SEC buffer containing 200 mM potassium phosphate pH 6.95, 250 mM potassium chloride and 10% isopropanol (v/v) on a sample of **ConjA** at 280 nm shows a monomer purity of over 99% with no impurity detected. UHPLC SEC analysis gives a concentration of final **ConjA** at 1.44 mg/mL in 9.0 mL, obtained mass of **ConjA** is 12.97 mg (86% yield).

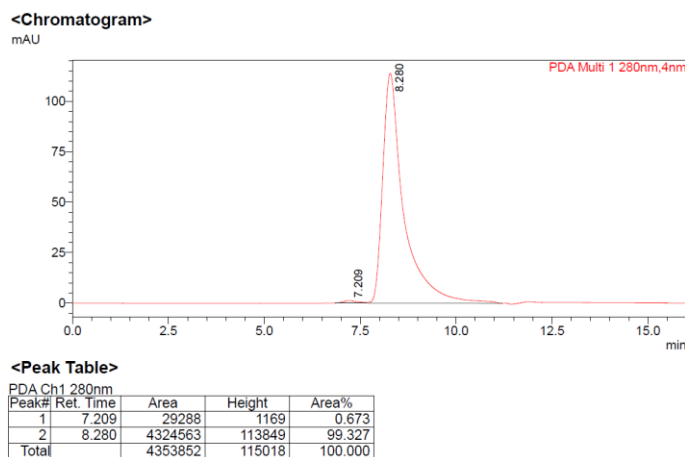

Fig C. UHPLC SEC of ConjA at 280 nm

### Conjugate B: site-specific Herceptin-SG3249 (ConjB)

A 50 mM solution of tris(2-carboxyethyl)phosphine hydrochloride (TCEP) in water was added (40 molar equivalent/antibody, 24 micromoles, 480  $\mu$ L) to a 20 mL solution of antibody (90 mg, 600 nanomoles) in reduction buffer containing phosphate-buffered saline pH 7.4 (PBS) and 1 mM ethylenediaminetetraacetic acid (EDTA) and a final antibody concentration of 4.5 mg/mL. The reduction mixture was heated at +37  $^{\circ}$ C for 2.5 hours in an incubator with gentle agitation. After cooling to room temperature, the reduced antibody was buffer exchanged, *via* dialysis using Slide-A-Lyzer dialysis cassettes (Thermo Fisher Scientific) into a reoxidation buffer containing PBS and 1 mM EDTA (2 x 4 L at +4  $^{\circ}$ C with stirring) to remove the excess reducing agent. A 50 mM solution of dehydroascorbic acid (DHAA, 20 molar equivalent/antibody, 12 micromoles, 240  $\mu$ L) in DMSO was added and the reoxidation mixture was allowed to react for 4 hours at room temperature with gentle agitation at an antibody concentration of  $\sim$  2.7 mg/mL (or until full reoxidation of the cysteine thiols to reform the inter-chain cysteine disulfides is observed by UHPLC). The reoxidation mixture was then sterile-filtered and diluted in a conjugation buffer containing PBS

and 1 mM EDTA for a final antibody concentration of 1.0 mg/mL. SG3249 was added as a DMSO solution (10 molar equivalent/antibody, 1.0 micromole, in 1.5 mL DMSO) to 13.5 mL of this reoxidised antibody solution (15 mg, 100 nanomoles) for a 10% (v/v) final DMSO concentration. The solution was mixed for 1.5 hours at room temperature, then the conjugation was quenched by addition of *N*-acetyl L-cysteine (4 micromoles, 400  $\mu$ L at 10 mM), concentrated, and injected into an AKTA™ Pure FPLC using a GE Healthcare HiLoad™ 26/600 column packed with Superdex 200 PG, eluting with 2.6 mL/min of sterile-filtered phosphate-buffered saline (PBS). Fractions corresponding to **ConjB** monomer peak were pooled, concentrated using a 15mL Amicon Ultracell 50KDa MWCO spin filter, analysed and sterile-filtered.

UHPLC analysis on a Shimadzu Prominence system using a Phenomenex Aeris 3.6u XB-C18 150 x 2.1 mm column eluting with a gradient of water and acetonitrile on a reduced sample of **ConjB** at 280 nm and 330 nm (SG3249 specific) shows unconjugated light chains and a mixture of unconjugated heavy chains and heavy chains attached to a single molecule of SG3249, consistent with a drug-per-antibody ratio (DAR) of 1.81 molecules of SG3249 per antibody.

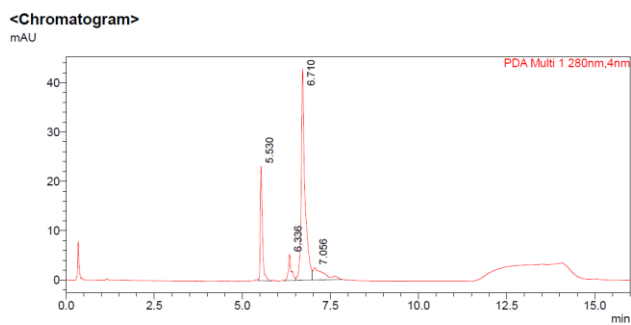

<Peak Table>  
PDA Ch1 280nm

| Peak# | Ret. Time | Area   | Height | Area%   |
|-------|-----------|--------|--------|---------|
| 1     | 5.530     | 97083  | 22886  | 19.415  |
| 2     | 6.336     | 29824  | 5156   | 5.964   |
| 3     | 6.710     | 319263 | 42702  | 63.846  |
| 4     | 7.056     | 53880  | 2499   | 10.775  |
| Total |           | 500049 | 73243  | 100.000 |

Fig D. UHPLC of reduced ConjB at 280 nm

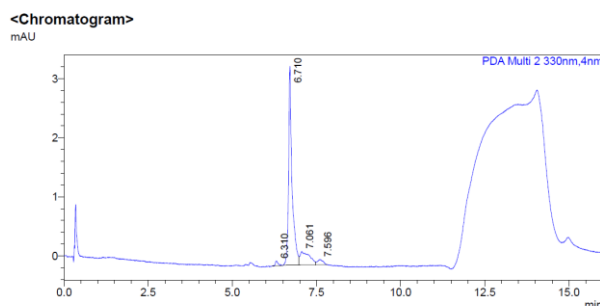

<Peak Table>  
PDA Ch2 330nm

| Peak# | Ret. Time | Area  | Height | Area%   |
|-------|-----------|-------|--------|---------|
| 1     | 6.310     | 480   | 79     | 1.588   |
| 2     | 6.710     | 24264 | 3351   | 80.180  |
| 3     | 7.061     | 4450  | 226    | 14.704  |
| 4     | 7.596     | 1068  | 87     | 3.528   |
| Total |           | 30262 | 3744   | 100.000 |

Fig E. UHPLC of reduced ConjB at 330 nm

UHPLC analysis on a Shimadzu Prominence system using a Tosoh Bioscience TSKgel G3000SWXL 5  $\mu$ m 7.8 x 300 mm column (with a 7  $\mu$ m 6.0 x 40 mm guard column) eluting with sterile-filtered SEC buffer containing 200 mM potassium phosphate pH 6.95, 250 mM potassium chloride and 10% isopropanol (v/v) on a sample of **ConjB** at 280 nm shows a monomer purity of over 99% with no impurity detected. UHPLC SEC analysis gives a concentration of final **ConjB** at 1.57 mg/mL in 8.5 mL, obtained mass of **ConjB** is 13.34 mg (89% yield).

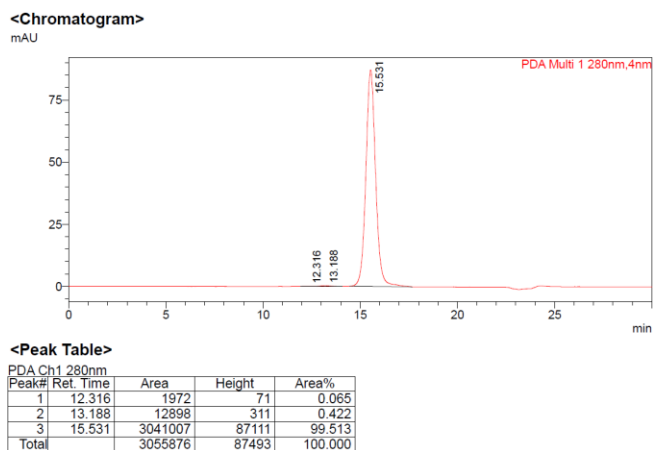

Fig F. UHPLC SEC of ConjB at 280 nm

### Conjugate C: non-binding IgG-SG3249 (ConjC)

A 50 mM solution of tris(2-carboxyethyl)phosphine hydrochloride (TCEP) in water was added (40 molar equivalent/antibody, 24 micromoles, 480  $\mu$ L) to a 20 mL solution of antibody (90 mg, 600 nanomoles) in reduction buffer containing phosphate-buffered saline pH 7.4 (PBS) and 1 mM ethylenediaminetetraacetic acid (EDTA) and a final antibody concentration of 4.5 mg/mL. The reduction mixture was heated at +37  $^{\circ}$ C for 2.5 hours in an incubator with gentle agitation. After cooling to room temperature, the reduced antibody was buffer exchanged, *via* dialysis using Slide-A-Lyzer dialysis cassettes (Thermo Fisher Scientific) into a reoxidation buffer containing PBS and 1 mM EDTA (2 x 4 L at +4  $^{\circ}$ C with stirring) to remove the excess reducing agent. A 50 mM solution of dehydroascorbic acid (DHAA, 20 molar equivalent/antibody, 12 micromoles, 240  $\mu$ L) in DMSO was added and the reoxidation mixture was allowed to react for 4 hours at room temperature with gentle agitation at an antibody concentration of  $\sim$  2.8 mg/mL (or until full reoxidation of the cysteine thiols to reform the inter-chain cysteine disulfides is observed by UHPLC). The reoxidation mixture was then sterile-filtered and diluted in a conjugation buffer containing PBS and 1 mM EDTA for a final antibody concentration of 1.0 mg/mL. SG3249 was added as a DMSO solution (10 molar equivalent/antibody, 1.0 micromole, in 1.5 mL DMSO) to 13.5 mL of this reoxidised antibody solution (15 mg, 100 nanomoles) for a 10% (*v/v*) final DMSO concentration. The solution was mixed for 1.5 hours at room temperature, then the conjugation was quenched by addition of *N*-acetyl L-cysteine (4 micromoles, 400  $\mu$ L at 10 mM), concentrated, and injected into an AKTA<sup>™</sup> Pure FPLC using a GE Healthcare HiLoad<sup>™</sup> 26/600 column packed with Superdex 200 PG, eluting with 2.6 mL/min of sterile-filtered phosphate-buffered saline (PBS).

Fractions corresponding to **ConjC** monomer peak were pooled, concentrated using a 15mL Amicon Ultracell 50KDa MWCO spin filter, analysed and sterile-filtered.

UHPLC analysis on a Shimadzu Prominence system using a Phenomenex Aeris 3.6u XB-C18 150 x 2.1 mm column eluting with a gradient of water and acetonitrile on a reduced sample of **ConjC** at 280 nm and 330 nm (SG3249 specific) shows unconjugated light chains and a mixture of unconjugated heavy chains and heavy chains attached to a single molecule of SG3249, consistent with a drug-per-antibody ratio (DAR) of 1.79 molecules of SG3249 per antibody.

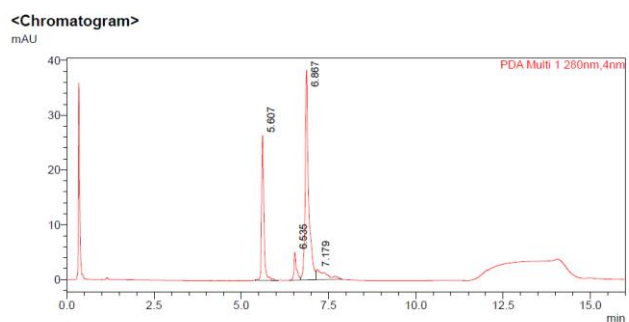

<Peak Table>

| Peak# | Ret. Time | Area   | Height | Area%   |
|-------|-----------|--------|--------|---------|
| 1     | 5.607     | 121124 | 26232  | 27.168  |
| 2     | 6.535     | 25518  | 5030   | 5.724   |
| 3     | 6.887     | 261800 | 38193  | 58.722  |
| 4     | 7.179     | 37389  | 1869   | 8.386   |
| Total |           | 445631 | 71324  | 100.000 |

Fig G. UHPLC of reduced ConjC at 280 nm

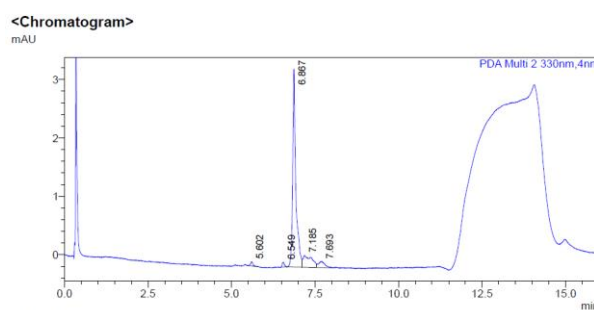

<Peak Table>

| Peak# | Ret. Time | Area  | Height | Area%   |
|-------|-----------|-------|--------|---------|
| 1     | 5.602     | 354   | 71     | 1.255   |
| 2     | 6.549     | 372   | 80     | 1.321   |
| 3     | 6.887     | 22296 | 3380   | 79.150  |
| 4     | 7.185     | 3743  | 200    | 13.286  |
| 5     | 7.693     | 1405  | 104    | 4.987   |
| Total |           | 28170 | 3835   | 100.000 |

Fig H. UHPLC of reduced ConjC at 330 nm

UHPLC analysis on a Shimadzu Prominence system using a Tosoh Bioscience TSKgel G3000SWXL 5 µm 7.8 x 300 mm column (with a 7 µm 6.0 x 40 mm guard column) eluting with sterile-filtered SEC buffer containing 200 mM potassium phosphate pH 6.95, 250 mM potassium chloride and 10% isopropanol (v/v) on a sample of **ConjC** at 280 nm shows a monomer purity of over 99% with no impurity detected. UHPLC SEC analysis gives a concentration of final **ConjC** at 1.43 mg/mL in 9.1 mL, obtained mass of **ConjC** is 13.02 mg (87% yield).

<Chromatogram>

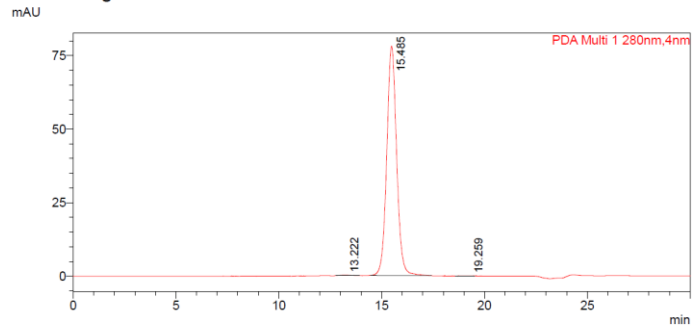

<Peak Table>

PDA Ch1 280nm

| Peak# | Ret. Time | Area    | Height | Area%   |
|-------|-----------|---------|--------|---------|
| 1     | 13.222    | 6345    | 192    | 0.243   |
| 2     | 15.485    | 2605614 | 77975  | 99.716  |
| 3     | 19.259    | 1069    | 37     | 0.041   |
| Total |           | 2613028 | 78204  | 100.000 |

Fig I. UHPLC SEC of ConjC at 280 nm
